# Supplementary material for: A nonlinear optical switch induced by an external electric field: inorganic alkaline–earth alkalide
Source: Royal Society of Chemistry journal article supplement (doi:10.1039/c9ra02470k), 2019-01-01
Supplement: c9ra02470k1.pdf [file c9ra02470k1.pdf]

## Supplementary Information

### Nonlinear Optical Switch Induced by External Electric Field: Inorganic

#### Alkaline-earth Alkalide

Bo Li,<sup>a</sup> Daoling Peng,<sup>a</sup> Feng Long Gu,<sup>\*,a</sup> Chaoyuan Zhu,<sup>a,b</sup>

<sup>a</sup>Key Laboratory of Theoretical Chemistry of Environment, Ministry of Education; School of Chemistry & Environment of South China Normal University, Guangzhou 510006, People's Republic of China.

E-mail address: gu@scnu.edu.cn (F. L. Gu)

<sup>b</sup>Department of Applied Chemistry, Institute of Molecular Science and Center for Interdisciplinary Molecular Science, National Chiao-Tung University, Hsinchu 30010, Taiwan.

\*Corresponding author

#### Contents

Table S1 The geometrical parameters of  $\text{Mg}(\text{NH}_3)_6\text{Na}_2$ .....S2

Table S2 The geometrical parameters of  $\text{Ca}(\text{NH}_3)_6\text{Na}_2$ .....S2

Table S3 Natural population analysis charge on Na atoms  $Q_{\text{Na}2}$  of  $\text{M}(\text{NH}_3)_6\text{Na}_2$ .....S2

Table S1 The geometrical parameters of  $\text{Mg}(\text{NH}_3)_6\text{Na}_2$  at CAM-B3LYP/6-311++G(2d,2p) level.

| $EEF(10^{-4}\text{a.u.})$ | L(Å)     | R1(Å)   | R2(Å)   | R3(Å)   | R4(Å)   |
|---------------------------|----------|---------|---------|---------|---------|
| 0                         | 10.10361 | 3.08437 | 2.23366 | 2.23366 | 3.08437 |
| 10                        | 10.11344 | 3.11612 | 2.23702 | 2.23044 | 3.06126 |
| 20                        | 10.14431 | 3.16033 | 2.24019 | 2.22726 | 3.04605 |
| 30                        | 10.20107 | 3.22046 | 2.24352 | 2.22412 | 3.03839 |
| 40                        | 10.29523 | 3.30597 | 2.24697 | 2.22103 | 3.03893 |
| 50                        | 10.45748 | 3.44346 | 2.25036 | 2.21807 | 3.05122 |
| 58                        | 10.72265 | 3.64835 | 2.25277 | 2.21669 | 3.08731 |
| 60                        | 10.83510 | 3.72813 | 2.25316 | 2.21694 | 3.10810 |
| 63                        | 11.09980 | 3.92423 | 2.25397 | 2.27720 | 3.15295 |

Table S2 The geometrical parameters of  $\text{Ca}(\text{NH}_3)_6\text{Na}_2$  at CAM-B3LYP/6-311++G(2d,2p) level.

| $EEF(10^{-4}\text{a.u.})$ | L(Å)     | R1(Å)   | R2(Å)   | R3(Å)   | R4(Å)   |
|---------------------------|----------|---------|---------|---------|---------|
| 0                         | 10.29636 | 3.09707 | 2.53116 | 2.53116 | 3.09707 |
| 10                        | 10.30591 | 3.12976 | 2.53577 | 2.52669 | 3.07383 |
| 20                        | 10.33623 | 3.17493 | 2.54055 | 2.52235 | 3.05868 |
| 30                        | 10.39296 | 3.23711 | 2.54542 | 2.51811 | 3.05105 |
| 40                        | 10.48970 | 3.32271 | 2.55054 | 2.51392 | 3.05153 |
| 50                        | 10.67081 | 3.47586 | 2.55582 | 2.50967 | 3.06415 |
| 53                        | 10.77546 | 3.53633 | 2.55669 | 2.50903 | 3.08164 |
| 60                        | 11.13142 | 3.60012 | 2.55296 | 2.51768 | 3.23702 |
| 68                        | 11.89544 | 3.74149 | 2.54774 | 2.53691 | 3.70137 |

Table S3 Natural population analysis charge on Na atoms  $Q_{\text{Na}_2}$  of  $\text{M}(\text{NH}_3)_6\text{Na}_2$  at CAM-B3LYP/6-311++G(2d,2p) level.

| $\text{Mg}(\text{NH}_3)_6\text{Na}_2$ |                   | $\text{Ca}(\text{NH}_3)_6\text{Na}_2$ |                   |
|---------------------------------------|-------------------|---------------------------------------|-------------------|
| $EEF(10^{-4}\text{a.u.})$             | $Q_{\text{Na}_2}$ | $EEF(10^{-4}\text{a.u.})$             | $Q_{\text{Na}_2}$ |
| 0                                     | -0.776            | 0                                     | -0.904            |
| 10                                    | -0.772            | 10                                    | -0.900            |
| 20                                    | -0.761            | 20                                    | -0.787            |
| 30                                    | -0.735            | 30                                    | -0.859            |
| 40                                    | -0.717            | 40                                    | -0.837            |
| 50                                    | -0.695            | 50                                    | -0.811            |
| 58                                    | -0.698            | 53                                    | -0.822            |
| 60                                    | -0.717            | 60                                    | -0.941            |
| 63                                    | -0.747            | 68                                    | -1.055            |
